# Supplementary material
Source: publisher site journal article supplement (https://www.spandidos-publications.com/7648/downloadSupplementary)
Supplement: Supplementary file 1 [file downloadSupplementary]

## Sheet: Sheet1
Table SI. Meta regression analysis.
A, Meta regression of research methodologies
ln_hr	Coef.	Std.Err.	t	P>|t|	[95% Conf. Interval]
type	-0.3	0.2	-1.5	0.2	-0.7	0.1
_cons	-0.4	0.2	-1.7	0.1	-0.8	0.1
B, Meta regression of combination of stereotactic body radiation therapy
ln_hr	Coef.	Std.Err.	t	P>|t|	[95% Conf. Interval]
type	0	0.2	-0.1	1	-0.4	0.3
_cons	-0.6	0.3	-2.2	0	-1.3	0
C, Meta regression of combination of transarterial chemoembolization
ln_hr	Coef.	Std.Err.	t	P>|t|	[95% Conf. Interval]
type	-0.1	0.2	-0.6	0.6	-0.5	0.3
_cons	-0.5	0.3	-1.7	0.1	-0.5	0.1
D, Meta regression of portal vein tumor thrombosis
ln_hr	Coef.	Std.Err.	t	P>|t|	[95% Conf. Interval]
type	0.2	0.1	1.4	0.2	-0.1	0.4
_cons	-1	0.2	-4.7	0	-1.4	-0.5
E, Meta regression of stage C subgroup
ln_hr	Coef.	Std.Err.	t	P>|t|	[95% Conf. Interval]
type	0	0.1	0.4	0.7	-0.2	0.3
_cons	-0.8	0.2	-3.6	0	-1.2	-0.3
